# Supplementary material for: A sandwich electrochemical immunoassay for Salmonella pullorum and Salmonella gallinarum based on a AuNPs/SiO2/Fe3O4adsorbing antibody and 4 channel screen printed carbon electrode electrodeposited gold nanoparticles
Source: Royal Society of Chemistry journal article supplement (doi:10.1039/c5ra12491c), 2015-01-01
Supplement: c5ra12491c1.pdf [file c5ra12491c1.pdf]

1     **A sandwich electrochemical immunoassay for *Salmonella***  
2             *pullorum* and *Salmonella gallinarum* based on

3     **AuNPs/SiO<sub>2</sub>/Fe<sub>3</sub>O<sub>4</sub> adsorpting antibody and 4 channels**  
4     **screen printed carbon electrode electrodeposited gold**  
5             **nanoparticles**

6                     Jianfeng Fei, Wenchao Dou\*, Guangying Zhao\*<sup>1</sup>

7             *Food Safety Key Lab of Zhejiang Province, College of Food Science and*  
8     *Biotechnology Engineering, Zhejiang Gongshang University, Hangzhou 310018, PR*  
9                                     *China*

---

<sup>1</sup> \*Corresponding author.

E-mail address: zhaogy-user@163.com (G. Zhao); wdou@zjsu.edu.cn (W. Dou).

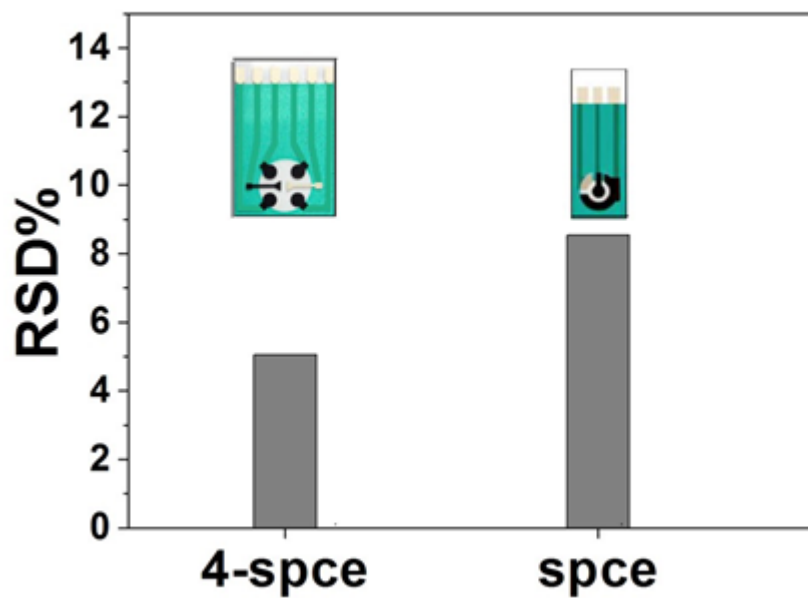

11  
 12 Fig. S.1 Comparison of reproducibility between SPCE and 4-SPCE.  
 13

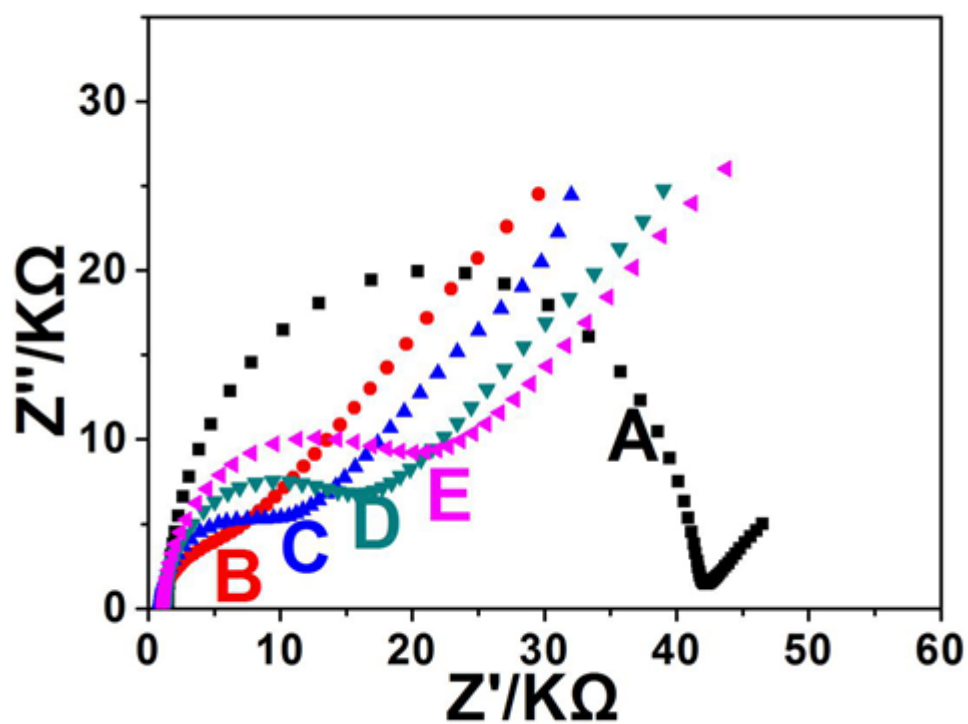

14  
 15 Fig. S.2 Nyquist plots of EIS: (A) Bare 4-SPCE, (B) AuNPs/4-SPCE, (C) Anti-*S.*  
 16 *pullorum* and *S. gallinarum*/AuMNP/4-SPCE, (D) *S. pullorum* and *S.*

17 *gallinarum*/Anti-*S. pullorum* and *S. gallinarum*/AuMNPs/4-SPCE, (E) HRP-anti-*S.*  
 18 *pullorum* and *S. gallinarum*/*S. pullorum* and *S. gallinarum*/Anti-*S. pullorum* and *S.*  
 19 *gallinarum*/AuMNPs/4-SPCE in 0.1 mM KCl containing 5.0 mM  $[\text{Fe}(\text{CN})_6]^{3-/4-}$ .  
 20  
 21

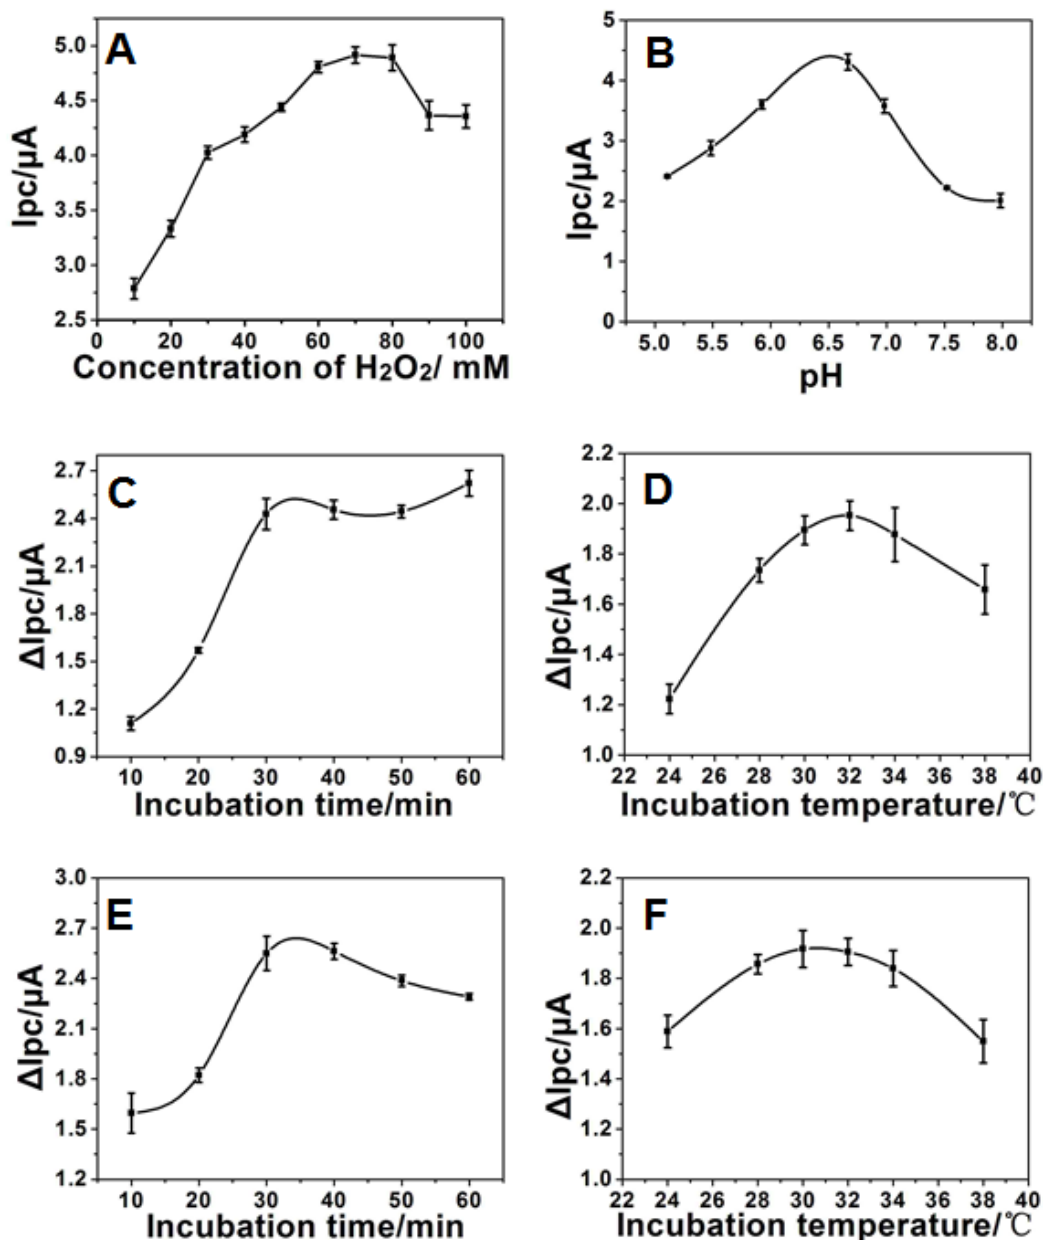

22  
 23 Fig. S.3 Optimization of the experimental parameters of the immunoassay method: (A)  
 24 Concentration of  $\text{H}_2\text{O}_2$ , (B) pH, (C) Incubation time between *S. pullorum* and *S.*  
 25 *gallinarum* and  $\text{Ab}_1/\text{AuMNPs}$ , (D) Incubation temperature between *S. pullorum* and *S.*  
 26 *gallinarum* and  $\text{Ab}_1/\text{AuMNPs}$ , (E) Incubation time between HRP-anti-*S. pullorum*  
 27 and *S. Gallinarum* and  $\text{Ag}/\text{Ab}_1/\text{AuMNPs}$ , (F) Incubation temperature between HRP-  
 28 anti-*S. pullorum* and *S. Gallinarum* and  $\text{Ag}/\text{Ab}_1/\text{AuMNP}$ .
